# Supplementary material
Source: PubMed Central journal article supplement (PMC8356474)
Supplement: NIHMS1626096-supplement-Supplemental_Materials.pdf [file NIHMS1626096-supplement-Supplemental_Materials.pdf]

# Supporting Information

## Combining Neurobehavioral Analysis and *In Vivo* Photoaffinity Labeling to Understand Protein Targets of Methamphetamine in Casper Zebrafish

*Ethel Tackie-Yarboi,<sup>1\*</sup> Alexander Wisner,<sup>2\*</sup> Austin Horton,<sup>1</sup> Tue Chau,<sup>1</sup> James Reigle,<sup>3,4</sup> Adam J. Funk,<sup>5</sup> Robert E. McCullumsmith,<sup>5,6</sup> F. Scott Hall,<sup>2</sup> Frederick Williams,<sup>2</sup> Isaac T. Schiefer<sup>1,7</sup>*

*(1) Department of Medicinal and Biological Chemistry, College of Pharmacy and Pharmaceutical Sciences, University of Toledo, Toledo, OH 43606*

*(2) Department of Pharmacology and Experimental Therapeutics, College of Pharmacy and Pharmaceutical Sciences, University of Toledo, Toledo, OH 43606*

*(3) Department of Biomedical Informatics, University of Cincinnati College of Medicine, Cincinnati, OH 45267, USA*

*(4) Division of Biomedical Informatics, Cincinnati Children's Hospital Medical Center, Cincinnati, OH 45229, USA*

*(5) Department of Neurosciences, College of Medicine, University of Toledo, Toledo, OH 43606*

*(6) Neurosciences Institute, Promedica, Toledo, OH 43606*

*(7) Center for Drug Design and Development, College of Pharmacy and Pharmaceutical Sciences, University of Toledo, Toledo, OH 43606*

## **List of Contents**

Supplement Figure S1: Characterization data for the phenethylamine probe, **2**.

Supplement Figure S2: HPLC-PDA analysis of photolytic breakdown of **2**.

Supplement Figure S3: Exposure Behavior Time Course

Supplement Figure S4: Novel tank test time course

Supplement Figure S5: Irradiation chamber

Supplement Figure S6: Bioinformatic analysis

Supplement Figure S7: Result from Psychoactive Drug Screening Program

Supplement Table S1: Sex of each zebrafish cohort

Provided as other attachments (not found in this document):

Supplement Table S2: Proteomics identified the selective pulldown

# Analysis Report

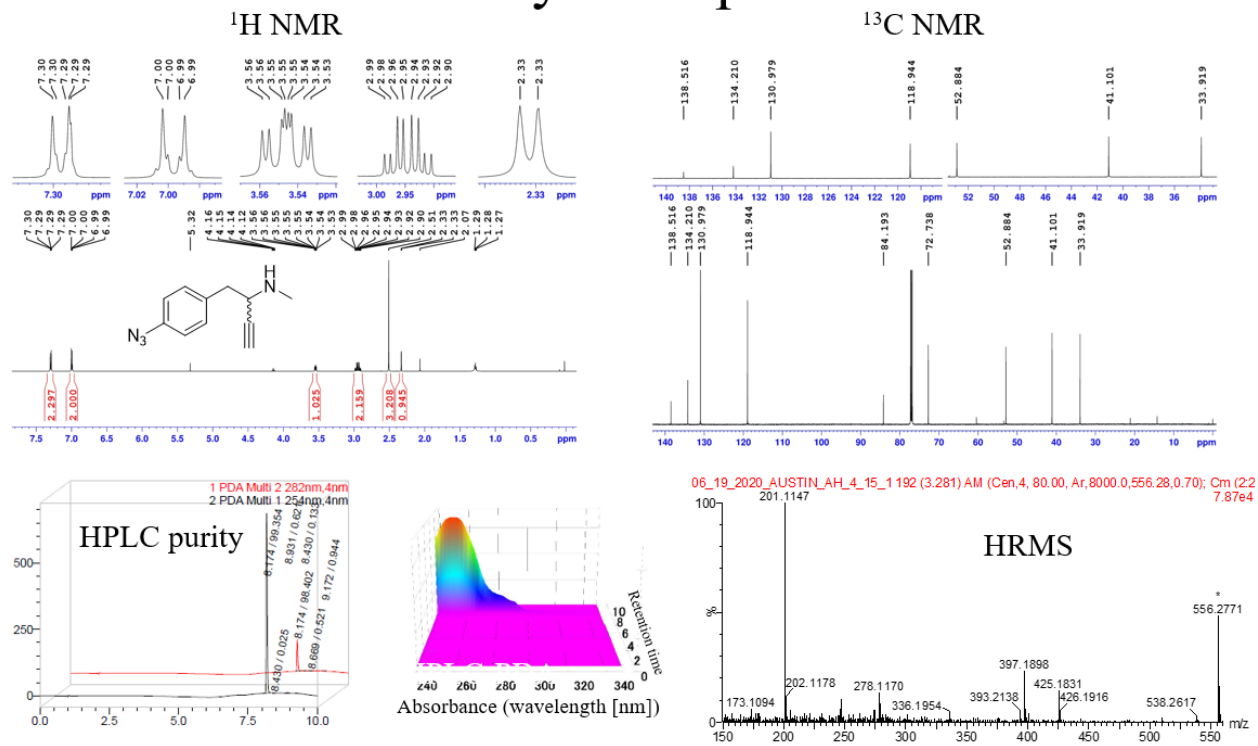

**Supplement Figure S1:** Characterization data for the phenethylamine probe, **2**.

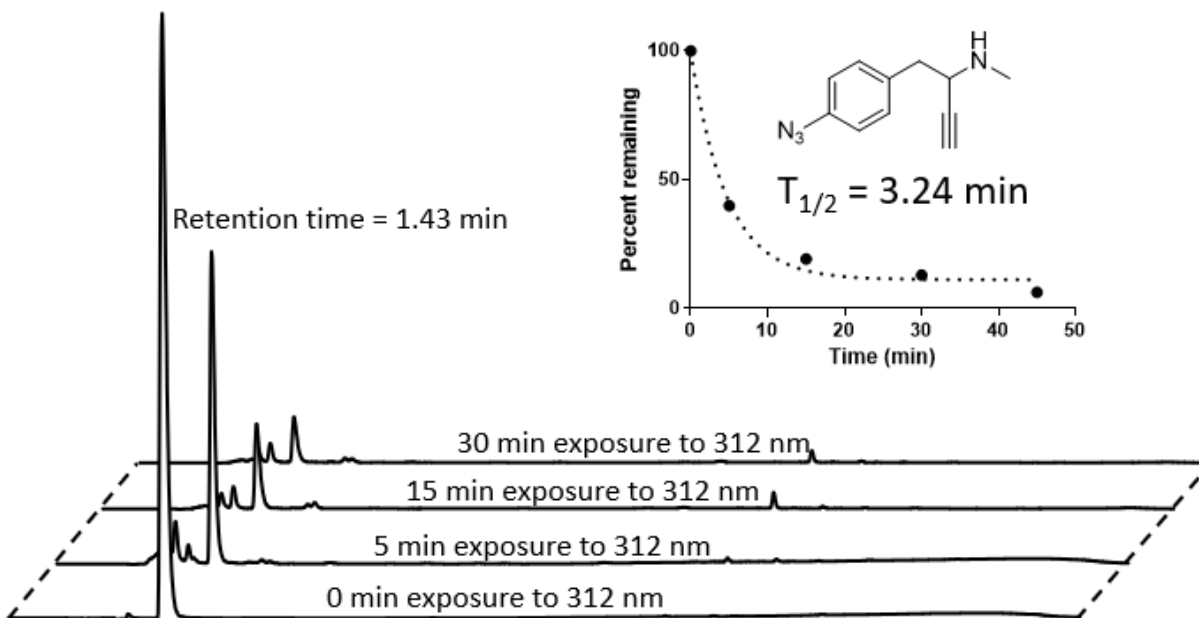

**Supplemental Figure S2.** Chromatograms of photolytic breakdown of **2** activated upon irradiation with 312 nm. Percent remaining was based on area under the curve (AUC) of UV absorption at 254 nm. Inset shows plot of changes in AUC with time and dotted line represents one-phase decay line of best fit ( $r^2 = 0.9916$ );  $t_{1/2} = 3.24$  min. Less than 10 % breakdown was observed after 30 min with 365 nm light (not shown).

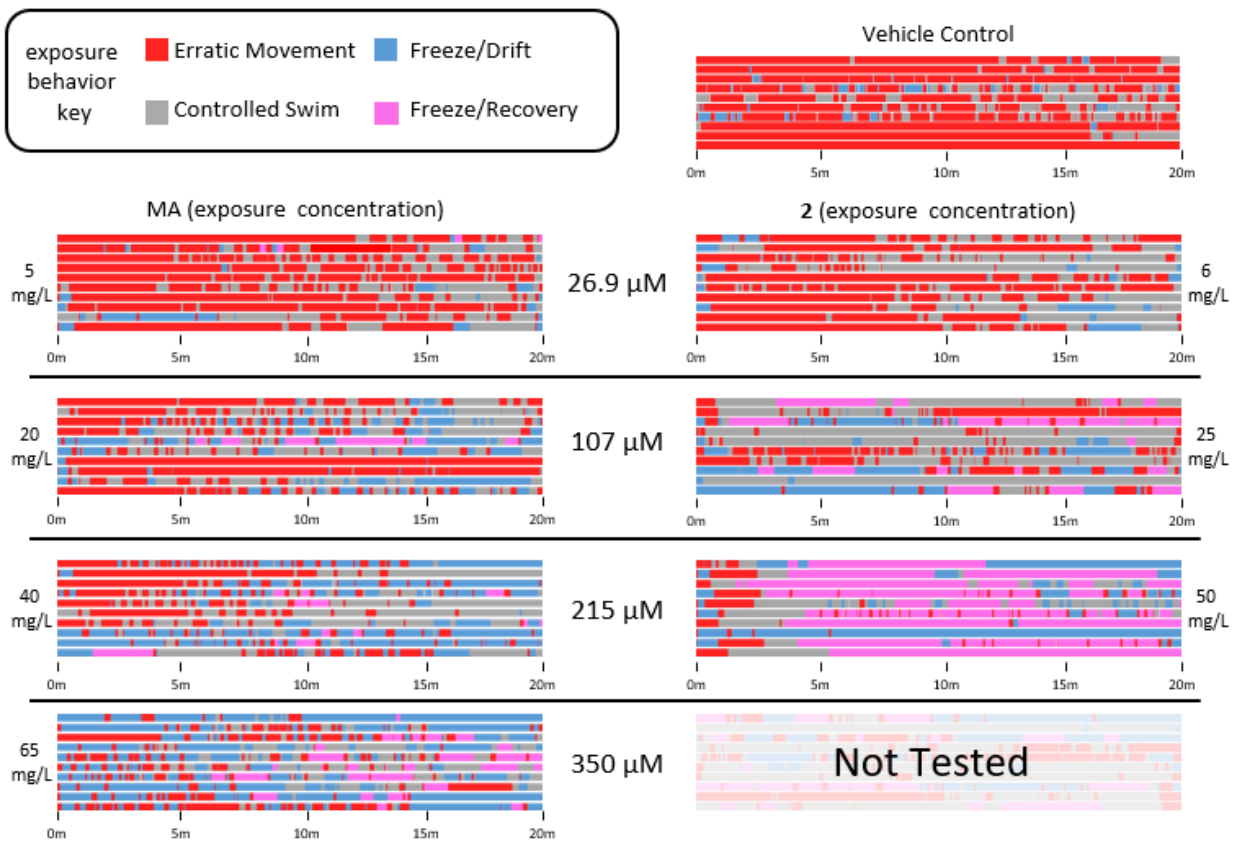

**Supplemental Figure S3. Exposure Behavior Time Course.** Each line indicates swimming behavior of an individual fish over the 20 min exposure period based on the color key shown above.

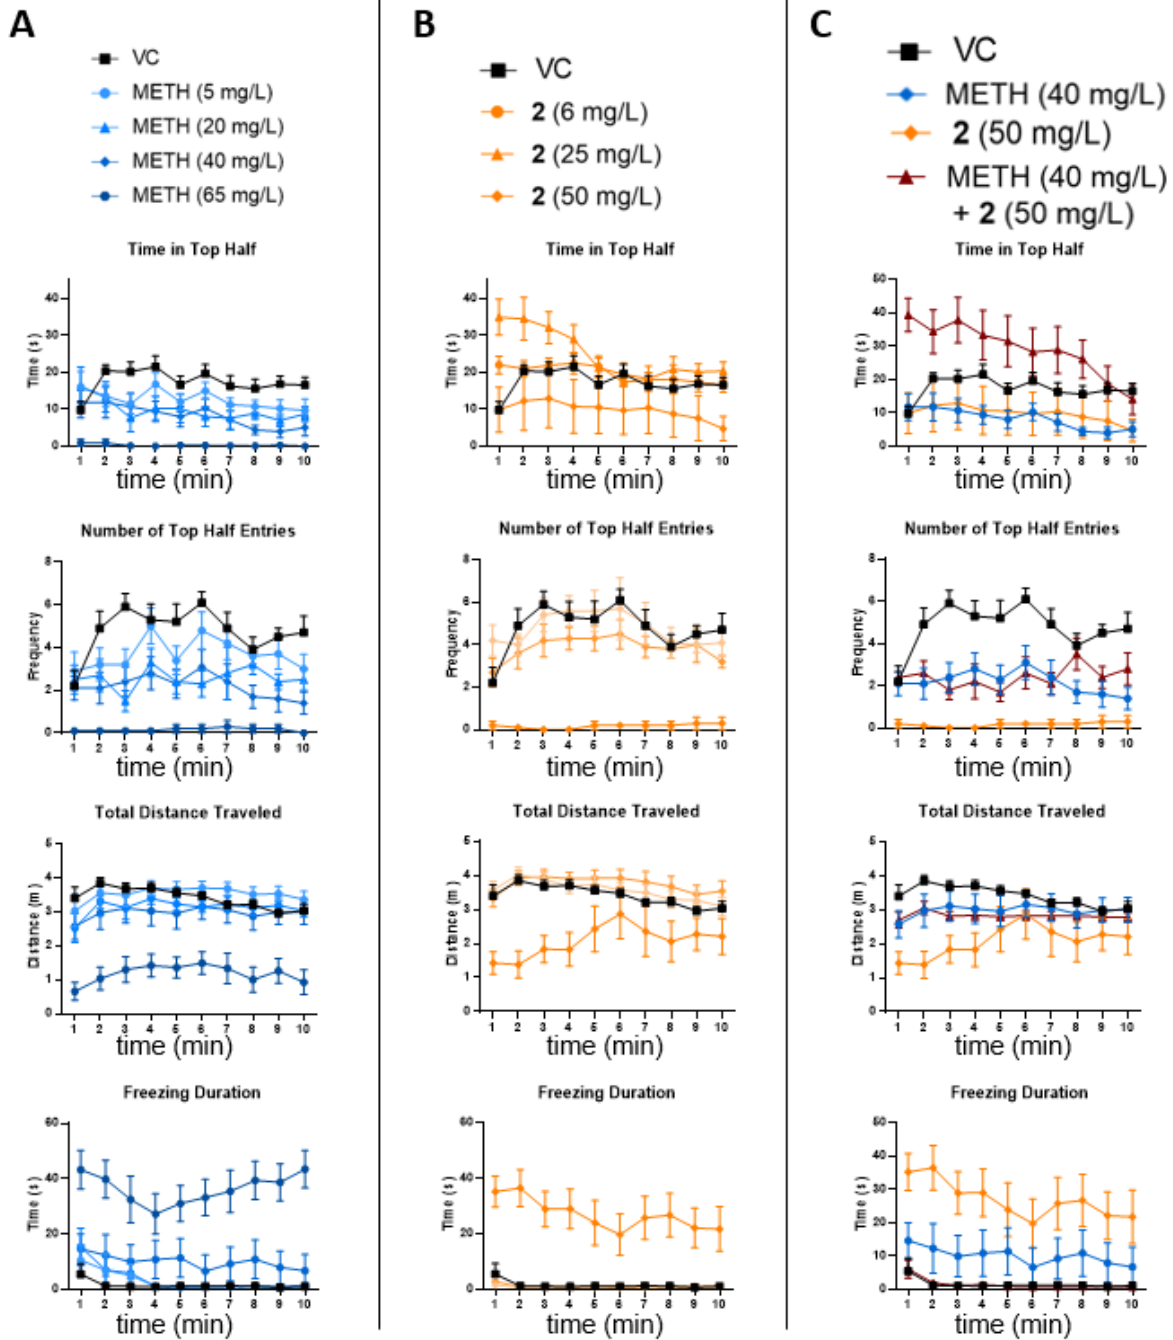

**Supplemental Figure S4.** Time course for specific behavioral readouts related to swimming in the novel tank test. Each data point represents preceding minute of activity for adult Casperfish treated with indicated concentrations of Meth (A), 2 (B), or co-incubation experiments. All data represented as mean  $\pm$  s.e.m. (N = 8-10 per cohort [randomly selected / sex balanced]).

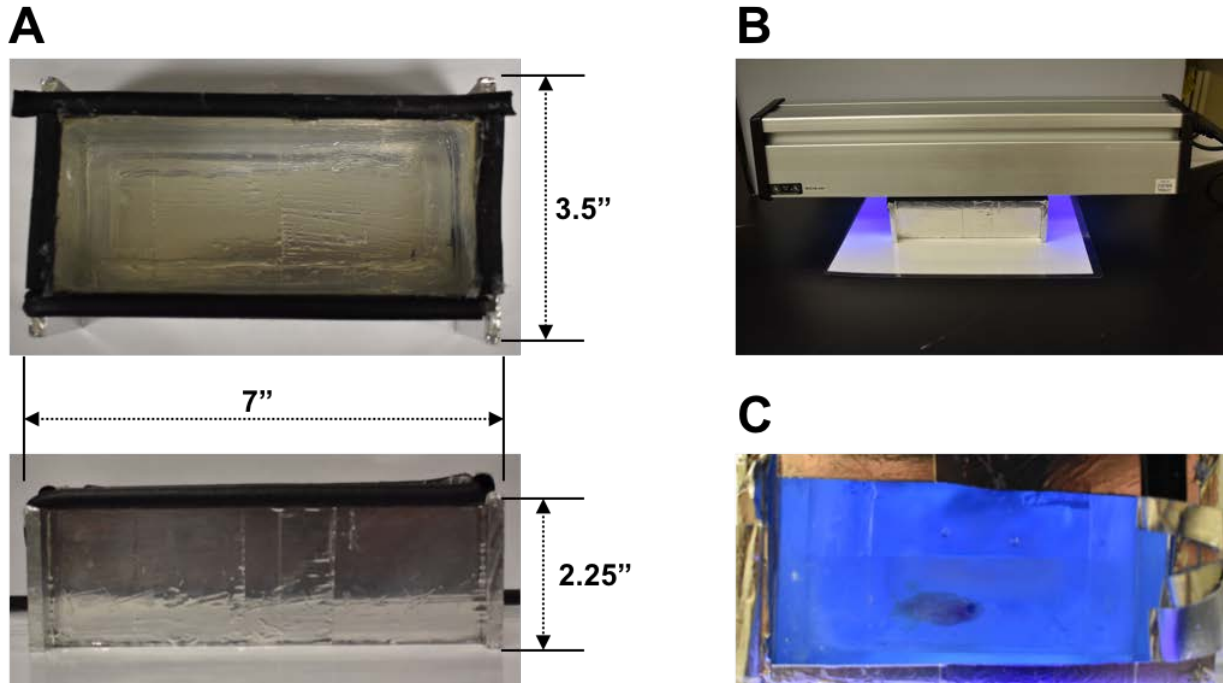

**Supplemental Figure S5.** A) Top and side view of custom-built irradiation chamber (3.5”W x 7”L x 2.25”H, acrylic). B) The top of the chamber is lined with weather stripping to prevent damage to the UV-lamps ( $\lambda$ -312 nm) and the exterior covered with foil to maximize exposure to irradiation from all angles. C). Zebrafish are irradiated with UV-light for 10 min to induce covalent attachment binding partners within the brain. No changes in tank water temperatures were observed.

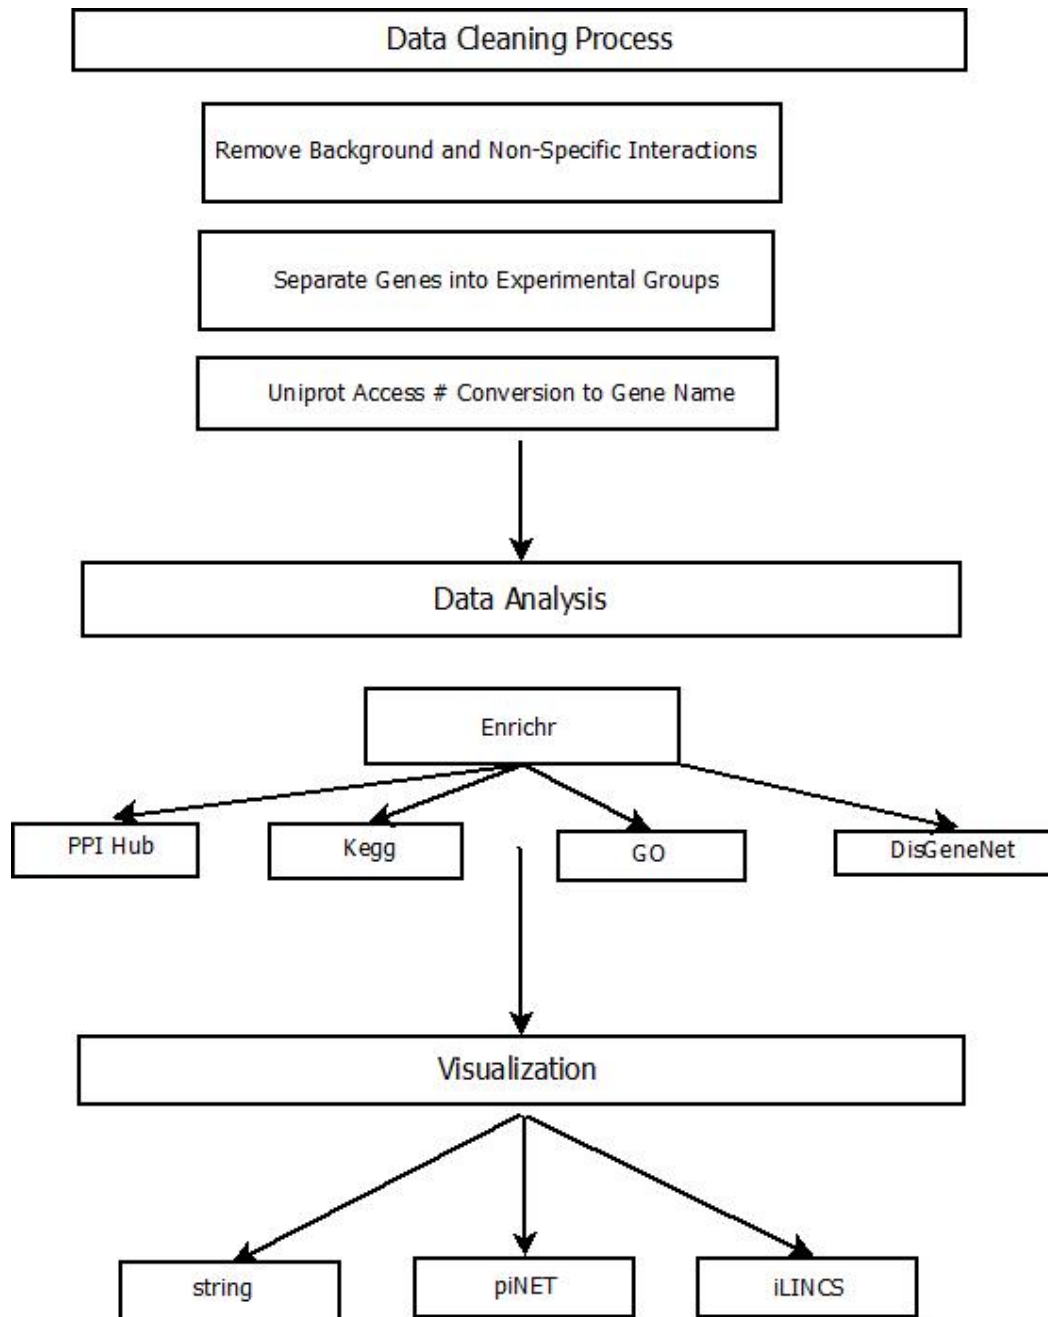

**Supplemental Figure S6.** Bioinformatic workflow.



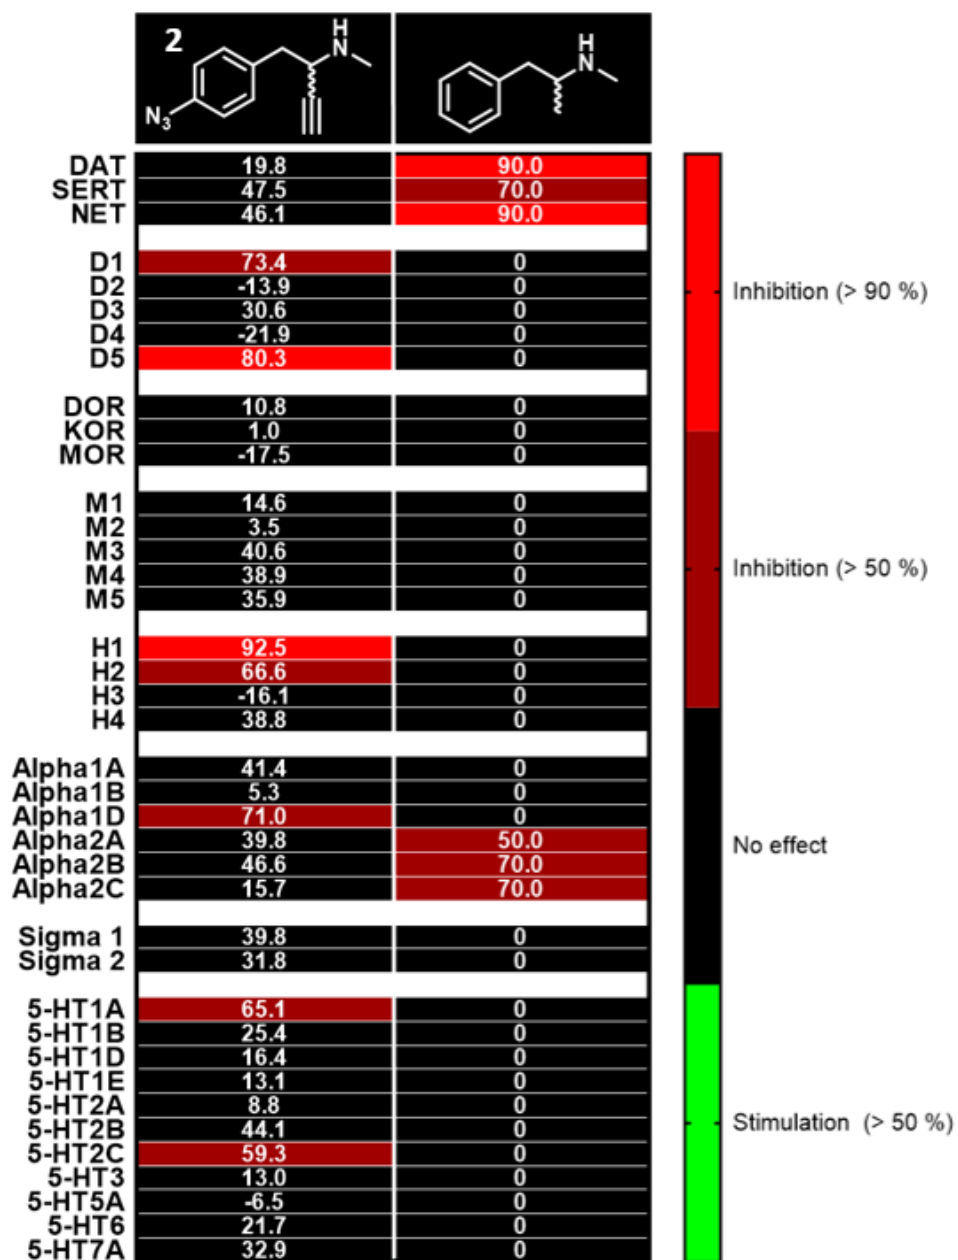

**Supplemental Figure S7.** The probe (2) was screened at (10  $\mu$ M) for ability to displace binding of orthosteric radioligands for cloned human receptors. Compounds exhibiting >50% inhibition are designated as ‘active’ and flagged for follow-up  $K_i$  determination in secondary binding experiments. Results for methamphetamine are provided for comparison (approximations based on published PDSP  $K_i$ 's).

| Treatment | Conc.       | Subject_ID      | Sex        | Total  |   |
|-----------|-------------|-----------------|------------|--------|---|
| VC        | VC          | 1,2,3,4,5,7     | Male       | 6      |   |
|           |             | 6,8,9,10        | Female     | 4      |   |
| MA        | 5 mg/L      | 2,3,4,7,8       | Male       | 5      |   |
|           |             | 1,5,6,9,10      | Female     | 5      |   |
|           | 20 mg/L     | 1,2,3,4,10      | Male       | 5      |   |
|           |             | 5,6,7,8,9       | Female     | 5      |   |
|           | 40 mg/L     | 1,3,4,6,8       | Male       | 5      |   |
|           |             | 2,5,7,9,10      | Female     | 5      |   |
|           | 65 mg/L     | 5,10            | Male       | 2      |   |
|           |             | 1,2,3,4,6,7,8,9 | Female     | 8      |   |
|           | 2           | 6 mg/L          | 3,5,6,7,8  | Male   | 5 |
|           |             |                 | 1,2,4,9,10 | Female | 5 |
| 25 mg/L   |             | 1,2,3,6,8       | Male       | 5      |   |
|           |             | 4,5,7,9,10      | Female     | 5      |   |
| 50 mg/L   |             | 2,4,6,9         | Male       | 4      |   |
|           |             | 1,3,5,7,8,10    | Female     | 6      |   |
| MA + 2    | 40, 50 mg/L | 1,2,4,5,6,8,9   | Male       | 7      |   |
|           |             | 3,7,10          | Female     | 3      |   |

**Supplemental Table 1.** Catalog of sex composition of all treatments.
